# Supplementary material
Source: MDPI journal article supplement (https://www.mdpi.com/2073-4441/12/10/2885)
Supplement: s1 [file s1 › water-925473-supplementary.pdf]

The supplementary materials include two parts.

The first parts comprise the figures and MUSIC (Model for Urban Stormwater Improvement Conceptualization) files of five designed scenarios in the study area. The arrows represent the direction of assumed stormwater flows and the university square is assumed as the outlet of the study area. These files are compressed in the same file as this document

The second parts comprise the questionnaire results and calculation procedures of sub-criteria in economic, social, and environmental aspect. They are provided and shown in this document.

## Supplementary material A: Questionnaire results

### Expert 1:

Date: 07/05/2020

Question 1: Are you familiar with the stormwater management in the study area or have you read the provided information at the first page?

☒ Yes ☐ No

Question 2: What is/are your best field(s)? (can choose more than one option)

- ☒ Urban Water Management ☐ Green Stormwater Infrastructure ☐ Sustainable Development ☐ Water Resource management  
☐ Water Policy and Governance ☒ Flooding Issues ☐ Waste Water Management ☐ Water Supply and Network  
☒ Underground Water ☐ Water Quality and Biodiversity ☒ Urban Water Planning ☐ Ecosystem  
Other fields \_\_\_\_\_

Question 3: Complete the following table.

| ATTRIBUTE                 | Flooding Control | Water Quality Improvement | Capital cost | O&M cost | Land Use Cost | Water Reuse Function | Livability | Water Retaining Function | Carbon Emission | Ecosystem Value |
|---------------------------|------------------|---------------------------|--------------|----------|---------------|----------------------|------------|--------------------------|-----------------|-----------------|
| Flooding Control          | 1                | 1                         | 5            | 7        | 2             | 1                    | -          | 2                        | 1               | 2               |
| Water Quality Improvement | -                | 1                         | 5            | 7        | -             | -                    | 1          | 1                        | 1               | 1               |
| Capital Cost              | -                | -                         | 1            | 2        | -             | -                    | -          | -                        | -               | -               |
| O&M Cost                  | -                | -                         | -            | 1        | -             | -                    | -          | -                        | -               | -               |
| Land Use Cost             | -                | 2                         | 2            | 2        | 1             | -                    | 1          | 1                        | -               | 2               |
| Water Reuse Function      | -                | -                         | 8            | 9        | 2             | 1                    | 1          | 1                        | 1               | 2               |
| Livability                | 2                | -                         | 7            | 7        | -             | -                    | 1          | 1                        | 1               | 3               |
| Water Retaining Function  | -                | -                         | 8            | 8        | -             | -                    | -          | 1                        | 1               | 2               |
| Carbon Emission           | -                | -                         | 7            | 9        | 2             | -                    | -          | -                        | 1               | 2               |
| Ecosystem Value           | -                | -                         | 2            | 2        | -             | -                    | -          | -                        | -               | 1               |

Signature: 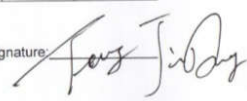

### Expert 2:

Date: 08/05/2020

Question 1: Are you familiar with the stormwater management in the study area or have you read the provided information at the first page?

☒ Yes ☐ No

Question 2: What is/are your best field(s)? (can choose more than one option)

- ☒ Urban Water Management ☒ Green Stormwater Infrastructure ☐ Sustainable Development ☒ Water Resource management  
☐ Water Policy and Governance ☐ Flooding Issues ☐ Waste Water Management ☐ Water Supply and Network  
☐ Underground Water ☒ Water Quality and Biodiversity ☒ Urban Water Planning ☐ Ecosystem  
Other fields \_\_\_\_\_

Question 3: Complete the following table.

| ATTRIBUTE                 | Flooding Control | Water Quality Improvement | Capital cost | O&M cost | Land Use Cost | Water Reuse Function | Livability | Water Retaining Function | Carbon Emission | Ecosystem Value |
|---------------------------|------------------|---------------------------|--------------|----------|---------------|----------------------|------------|--------------------------|-----------------|-----------------|
| Flooding Control          | 1                | 1                         | 3            | 4        | 3             | -                    | 1          | -                        | -               | 2               |
| Water Quality Improvement | -                | 1                         | 3            | 4        | 4             | 1                    | -          | -                        | -               | 2               |
| Capital Cost              | -                | -                         | 1            | 3/2      | 3/2           | -                    | -          | -                        | -               | -               |
| O&M Cost                  | -                | -                         | -            | 1        | 1             | -                    | -          | -                        | -               | -               |
| Land Use Cost             | -                | -                         | -            | -        | 1             | -                    | -          | -                        | -               | 1               |
| Water Reuse Function      | 2                | -                         | 5            | 7        | 3             | 1                    | 2          | 2                        | 1               | 2               |
| Livability                | -                | 5/4                       | 4            | 6        | 2             | -                    | 1          | 1                        | 1               | 3/2             |
| Water Retaining Function  | 6/5              | 5/4                       | 5            | 7        | 3             | -                    | -          | 1                        | 1               | 2               |
| Carbon Emission           | 6/5              | 5/4                       | 5            | 7        | 2             | -                    | -          | -                        | 1               | 2               |
| Ecosystem Value           | -                | -                         | 2            | 3        | -             | -                    | -          | -                        | -               | 1               |

Signature: 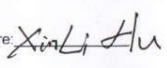

### Expert 3:

Date: 07/05/2020

Question 1: Are you familiar with the stormwater management in the study area or have you read the provided information at the first page?

☒ Yes ☐ No

Question 2: What is/are your best field(s)? (can choose more than one option)

- ☒ Urban Water Management    ☒ Green Stormwater Infrastructure    ☒ Sustainable Development    ☒ Water Resource management  
☒ Water Policy and Governance    ☒ Flooding Issues    ☐ Waste Water Management    ☐ Water Supply and Network  
☐ Underground Water    ☐ Water Quality and Biodiversity    ☐ Urban Water Planning    ☐ Ecosystem  
 Other fields: \_\_\_\_\_

Question 3: Complete the following table.

| ATTRIBUTE                 | Flooding Control | Water Quality Improvement | Capital cost | O&M cost | Land Use Cost | Water Reuse Function | Livability | Water Retaining Function | Carbon Emission | Ecosystem Value |
|---------------------------|------------------|---------------------------|--------------|----------|---------------|----------------------|------------|--------------------------|-----------------|-----------------|
| Flooding Control          | 1                | 2                         | 6            | 7        | 2             | -                    | -          | -                        | -               | 1               |
| Water Quality Improvement | -                | 1                         | 4            | 6        | 1             | -                    | -          | -                        | -               | -               |
| Capital Cost              | -                | -                         | 1            | 3/2      | -             | -                    | -          | -                        | -               | -               |
| O&M Cost                  | -                | -                         | -            | 1        | -             | -                    | -          | -                        | -               | -               |
| Land Use Cost             | -                | -                         | 5/2          | 3        | 1             | -                    | -          | -                        | -               | -               |
| Water Reuse Function      | 6/5              | 2                         | 6            | 9        | 2             | 1                    | 5/4        | 5/4                      | -               | 1               |
| Livability                | 5/4              | 2                         | 8            | 7        | 3/2           | -                    | 1          | 1                        | -               | 2               |
| Water Retaining Function  | 3/2              | 2                         | 7            | 7        | 4/3           | -                    | -          | 1                        | -               | 2               |
| Carbon Emission           | 2                | 3                         | 9            | 9        | 3             | 2                    | 2          | 2                        | 1               | 3               |
| Ecosystem Value           | -                | 2                         | 5            | 5        | 2             | -                    | -          | -                        | -               | 1               |

Signature: *J. Santamaría*

### Expert 4:

Date: 07/05/2020

Question 1: Are you familiar with the stormwater management in the study area or have you read the provided information at the first page?

☒ Yes ☐ No

Question 2: What is/are your best field(s)? (can choose more than one option)

- ☐ Urban Water Management    ☐ Green Stormwater Infrastructure    ☐ Sustainable Development    ☒ Water Resource management  
☐ Water Policy and Governance    ☐ Flooding Issues    ☒ Waste Water Management    ☒ Water Supply and Network  
☒ Underground Water    ☐ Water Quality and Biodiversity    ☐ Urban Water Planning    ☐ Ecosystem  
 Other fields: \_\_\_\_\_

Question 3: Complete the following table.

| ATTRIBUTE                 | Flooding Control | Water Quality Improvement | Capital cost | O&M cost | Land Use Cost | Water Reuse Function | Livability | Water Retaining Function | Carbon Emission | Ecosystem Value |
|---------------------------|------------------|---------------------------|--------------|----------|---------------|----------------------|------------|--------------------------|-----------------|-----------------|
| Flooding Control          | 1                | 1                         | 2            | 2        | 3             | 1                    | -          | 1                        | -               | -               |
| Water Quality Improvement | -                | 1                         | 3            | 4        | 2             | 1                    | -          | 2                        | -               | 1               |
| Capital Cost              | -                | -                         | 1            | 1        | 2             | -                    | -          | -                        | -               | -               |
| O&M Cost                  | -                | -                         | -            | 1        | 1             | -                    | -          | -                        | -               | -               |
| Land Use Cost             | -                | -                         | -            | -        | 1             | -                    | -          | -                        | -               | -               |
| Water Reuse Function      | -                | -                         | 3            | 2        | 4             | 1                    | 2          | 2                        | 1               | -               |
| Livability                | 2                | 2                         | 3            | 4        | 5             | -                    | 1          | 2                        | 1               | 1               |
| Water Retaining Function  | -                | -                         | 2            | 3        | 4             | -                    | -          | 1                        | -               | 1               |
| Carbon Emission           | 2                | 3                         | 4            | 6        | 6             | -                    | -          | 2                        | 1               | 2               |
| Ecosystem Value           | 2                | -                         | 5            | 4        | 6             | 2                    | -          | -                        | -               | 1               |

Signature: *Augusto Pérez*

After questionnaire assessment, the main fields of expert 4 (wastewater management, water supply and network, water resource management and underground water) are NOT relevant to the paper. Therefore, the results of expert 1, 2 and 3 are accepted.

## Supplementary material B: Calculation procedures for sub-criteria in economic, social, and environmental aspect

### Scenario 1:

| Scenario 1                                         | Area<br>(kL or m <sup>2</sup> )                                          | Unit cost<br>(AU\$/kL or m <sup>2</sup> )                               | O&M cost<br>(AU\$/unit/yr) | Net carbon footprint<br>(kg CO <sub>2</sub> -e/m <sup>2</sup> ) | House price increase<br>(AU\$/unit) |
|----------------------------------------------------|--------------------------------------------------------------------------|-------------------------------------------------------------------------|----------------------------|-----------------------------------------------------------------|-------------------------------------|
| Stormwater tank                                    | 1500 kL or 525 m <sup>2</sup> (900 kL or 225 m <sup>2</sup> is existing) | 1000/kL                                                                 | 0.5/kL                     | 80                                                              | 0                                   |
| Pond                                               | 150 m <sup>2</sup> (300 m <sup>2</sup> in normal level)                  | 150                                                                     | 10                         | 8.1                                                             | 0.0646                              |
| Bioretention areas                                 | 30 m <sup>2</sup>                                                        | 1000                                                                    | 5                          | 2.5                                                             | 0.0408                              |
| Swale                                              | 0                                                                        | 25                                                                      | 3                          | 3.5                                                             | 0.0408                              |
| Capital cost                                       |                                                                          | 600 × 1000 + 300 × 150 + 30 × 1000 = \$675000                           |                            |                                                                 |                                     |
| O&M cost                                           |                                                                          | 0.5 × 1500 + 10 × 300 + 5 × 30 = \$3900/yr                              |                            |                                                                 |                                     |
| Total size                                         |                                                                          | 525 + 150 + 30 = 705 m <sup>2</sup>                                     |                            |                                                                 |                                     |
| Total house increase                               |                                                                          | 0.0646 × 150 + 0.0408 × 30 = 10.914                                     |                            |                                                                 |                                     |
| Retaining function of tank and pond                |                                                                          | 1500 + 300 = 1800 kL                                                    |                            |                                                                 |                                     |
| Retaining function of bioretention areas and swale |                                                                          | 30 m <sup>2</sup>                                                       |                            |                                                                 |                                     |
| Water reuse function                               |                                                                          | 1500 + 300 = 1800 kL                                                    |                            |                                                                 |                                     |
| Carbon emission                                    |                                                                          | 80 × 525 + 8.1 × 150 + 2.5 × 30 = 43290 kg CO <sub>2</sub> -e in 30 yrs |                            |                                                                 |                                     |
| Ecosystem values                                   |                                                                          | 0.0120                                                                  |                            |                                                                 |                                     |

Water retaining function = 1800 m<sup>2</sup> × 8.68% + 20 m<sup>2</sup> × 5.79% = 158.00 m<sup>2</sup>

### Scenario 2:

| Scenario 2                                         | Area<br>(kL or m <sup>2</sup> )                                          | Unit cost<br>(AU\$/kL or m <sup>2</sup> )                                           | O&M cost<br>(AU\$/unit/yr) | Net carbon footprint<br>(kg CO <sub>2</sub> -e/m <sup>2</sup> ) | House price increase<br>(AU\$/unit) |
|----------------------------------------------------|--------------------------------------------------------------------------|-------------------------------------------------------------------------------------|----------------------------|-----------------------------------------------------------------|-------------------------------------|
| Stormwater tank                                    | 1350 kL or 450 m <sup>2</sup> (900 kL or 225 m <sup>2</sup> is existing) | 1000/kL                                                                             | 0.5/kL                     | 80                                                              | 0                                   |
| Pond                                               | 100 m <sup>2</sup> (200 m <sup>2</sup> in normal level)                  | 150                                                                                 | 10                         | 8.1                                                             | 0.0646                              |
| Bioretention areas                                 | 150 m <sup>2</sup>                                                       | 1000                                                                                | 5                          | 2.5                                                             | 0.0408                              |
| Swale                                              | 50 m <sup>2</sup>                                                        | 25                                                                                  | 3                          | 3.5                                                             | 0.0408                              |
| Capital cost                                       |                                                                          | 450 × 1000 + 200 × 150 + 150 × 1000 + 50 × 25 = \$631250                            |                            |                                                                 |                                     |
| O&M cost                                           |                                                                          | 0.5 × 1200 + 10 × 100 + 5 × 90 + 3 × 150 = \$3575/yr                                |                            |                                                                 |                                     |
| Total size                                         |                                                                          | 450 + 100 + 150 + 50 = 750 m <sup>2</sup>                                           |                            |                                                                 |                                     |
| Total house increase                               |                                                                          | 0.0646 × 100 + 0.0408 × 150 + 0.0408 × 50 = 14.620                                  |                            |                                                                 |                                     |
| Retaining function of tank and pond                |                                                                          | 1350 + 200 = 1550 kL                                                                |                            |                                                                 |                                     |
| Retaining function of bioretention areas and swale |                                                                          | 150 + 50 = 200 m <sup>2</sup>                                                       |                            |                                                                 |                                     |
| Water reuse function                               |                                                                          | 1350 + 200 = 1550 kL                                                                |                            |                                                                 |                                     |
| Carbon emission                                    |                                                                          | 80 × 450 + 8.1 × 100 + 2.5 × 150 + 3.5 × 50 = 37535 kg CO <sub>2</sub> -e in 30 yrs |                            |                                                                 |                                     |
| Ecosystem values                                   |                                                                          | 0.0204                                                                              |                            |                                                                 |                                     |

Water retaining function = 1550 m<sup>2</sup> × 8.68% + 200 m<sup>2</sup> × 5.79% = 146.13 m<sup>2</sup>

### Scenario 3:

| Scenario 3                                         | Area<br>(kL or m <sup>2</sup> )                                          | Unit cost<br>(AU\$/kL or m <sup>2</sup> )                                           | O&M cost<br>(AU\$/unit/yr) | Net carbon footprint<br>(kg CO <sub>2</sub> -e/m <sup>2</sup> ) | House price increase<br>(AU\$/unit) |
|----------------------------------------------------|--------------------------------------------------------------------------|-------------------------------------------------------------------------------------|----------------------------|-----------------------------------------------------------------|-------------------------------------|
| Stormwater tank                                    | 1200 kL or 375 m <sup>2</sup> (900 kL or 225 m <sup>2</sup> is existing) | 1000/kL                                                                             | 0.5/kL                     | 80                                                              | 0                                   |
| Pond                                               | 100 m <sup>2</sup> (200 m <sup>2</sup> in normal level)                  | 150                                                                                 | 10                         | 8.1                                                             | 0.0646                              |
| Bioretention areas                                 | 120 m <sup>2</sup>                                                       | 1000                                                                                | 5                          | 2.5                                                             | 0.0408                              |
| Swale                                              | 150 m <sup>2</sup>                                                       | 25                                                                                  | 3                          | 3.5                                                             | 0.0408                              |
| Capital cost                                       |                                                                          | 300 × 1000 + 200 × 150 + 120 × 1000 + 150 × 25 = \$453750                           |                            |                                                                 |                                     |
| O&M cost                                           |                                                                          | 0.5 × 1200 + 10 × 200 + 5 × 120 + 3 × 150 = \$3650/yr                               |                            |                                                                 |                                     |
| Total size                                         |                                                                          | 375 + 100 + 120 + 100 = 695 m <sup>2</sup>                                          |                            |                                                                 |                                     |
| Total house increase                               |                                                                          | 0.0646 × 100 + 0.0408 × 120 + 0.0408 × 100 = 17.476                                 |                            |                                                                 |                                     |
| Retaining function of tank and pond                |                                                                          | 1200 + 200 = 1400 kL                                                                |                            |                                                                 |                                     |
| Retaining function of bioretention areas and swale |                                                                          | 120 + 150 = 270 m <sup>2</sup>                                                      |                            |                                                                 |                                     |
| Water reuse function                               |                                                                          | 1200 + 200 = 1400 kL                                                                |                            |                                                                 |                                     |
| Carbon emission                                    |                                                                          | 80 × 375 + 8.1 × 100 + 2.5 × 150 + 3.5 × 50 = 31635 kg CO <sub>2</sub> -e in 30 yrs |                            |                                                                 |                                     |
| Ecosystem values                                   |                                                                          | 0.0192                                                                              |                            |                                                                 |                                     |

Water retaining function = 1400 × 8.68% + 270 × 5.79% = 137.16

#### Scenario 4:

| Scenario 4                                         | Area<br>(kL or m <sup>2</sup> )                                         | Unit cost<br>(AU\$/kL or m <sup>2</sup> )                                           | O&M cost<br>(AU\$/unit/yr) | Net carbon footprint<br>(kg CO <sub>2</sub> -e/m <sup>2</sup> ) | House price increase<br>(AU\$/unit) |
|----------------------------------------------------|-------------------------------------------------------------------------|-------------------------------------------------------------------------------------|----------------------------|-----------------------------------------------------------------|-------------------------------------|
| Stormwater tank                                    | 950 kL or 250 m <sup>2</sup> (900 kL or 225 m <sup>2</sup> is existing) | 1000/kL                                                                             | 0.5/kL                     | 80                                                              | 0                                   |
| Pond                                               | 50 m <sup>2</sup> (100 m <sup>2</sup> in normal level)                  | 150                                                                                 | 10                         | 8.1                                                             | 0.0646                              |
| Bioretention areas                                 | 170 m <sup>2</sup>                                                      | 1000                                                                                | 5                          | 2.5                                                             | 0.0408                              |
| Swale                                              | 150 m <sup>2</sup>                                                      | 25                                                                                  | 3                          | 3.5                                                             | 0.0408                              |
| Capital cost                                       |                                                                         | 50 × 1000 + 100 × 150 + 170 × 1000 + 150 × 25 = \$238750                            |                            |                                                                 |                                     |
| O&M cost                                           |                                                                         | 0.5 × 750 + 10 × 100 + 5 × 170 + 3 × 150 = 2775\$/yr                                |                            |                                                                 |                                     |
| Total size                                         |                                                                         | 250 + 50 + 170 + 150 = 620 m <sup>2</sup>                                           |                            |                                                                 |                                     |
| Total house increase                               |                                                                         | 0.0646 × 50 + 0.0408 × 170 + 0.0408 × 150 = 16.286                                  |                            |                                                                 |                                     |
| Retaining function of tank and pond                |                                                                         | 950 + 100 = 1050 kL                                                                 |                            |                                                                 |                                     |
| Retaining function of bioretention areas and swale |                                                                         | 170 + 150 = 320 m <sup>2</sup>                                                      |                            |                                                                 |                                     |
| Water reuse function                               |                                                                         | 950 + 100 = 1050 kL                                                                 |                            |                                                                 |                                     |
| Carbon emission                                    |                                                                         | 80 × 250 + 8.1 × 50 + 2.5 × 170 + 3.5 × 150 = 21355 kg CO <sub>2</sub> -e in 30 yrs |                            |                                                                 |                                     |
| Ecosystem values                                   |                                                                         | 0.0241                                                                              |                            |                                                                 |                                     |

Water retaining function = 1050 m<sup>2</sup> × 8.68% + 320 m<sup>2</sup> × 5.79% = 109.67 m<sup>2</sup>

#### Scenario 5:

| Scenario 5                                         | Area<br>(kL or m <sup>2</sup> )                                        | Unit cost<br>(AU\$/kL or m <sup>2</sup> )                                           | O&M cost<br>(AU\$/unit/yr) | Net carbon footprint<br>(kg CO <sub>2</sub> -e/m <sup>2</sup> ) | House price increase<br>(AU\$/unit) |
|----------------------------------------------------|------------------------------------------------------------------------|-------------------------------------------------------------------------------------|----------------------------|-----------------------------------------------------------------|-------------------------------------|
| Stormwater tank                                    | 300 kL or 150 m <sup>2</sup> (150 kL or 75 m <sup>2</sup> is existing) | 1000/kL                                                                             | 0.5/kL                     | 80                                                              | 0                                   |
| Pond                                               | 50 m <sup>2</sup> (100 m <sup>2</sup> in normal level)                 | 150                                                                                 | 10                         | 8.1                                                             | 0.0646                              |
| Bioretention areas                                 | 250 m <sup>2</sup>                                                     | 1000                                                                                | 5                          | 2.5                                                             | 0.0408                              |
| Swale                                              | 200 m <sup>2</sup>                                                     | 25                                                                                  | 3                          | 3.5                                                             | 0.0408                              |
| Capital cost                                       |                                                                        | 150 × 1000 + 100 × 150 + 250 × 1000 + 200 × 25 = \$420000                           |                            |                                                                 |                                     |
| O&M cost                                           |                                                                        | 0.5 × 300 + 10 × 100 + 5 × 250 + 3 × 200 = 3000\$/yr                                |                            |                                                                 |                                     |
| Total size                                         |                                                                        | 150 + 50 + 250 + 200 = 650 m <sup>2</sup>                                           |                            |                                                                 |                                     |
| Total house increase                               |                                                                        | 0.0646 × 50 + 0.0408 × 250 + 0.0408 × 200 = 21.590                                  |                            |                                                                 |                                     |
| Retaining function of tank and pond                |                                                                        | 300 + 100 = 400 kL                                                                  |                            |                                                                 |                                     |
| Retaining function of bioretention areas and swale |                                                                        | 250 + 200 = 450 m <sup>2</sup>                                                      |                            |                                                                 |                                     |
| Water reuse function                               |                                                                        | 300 + 100 = 400 kL                                                                  |                            |                                                                 |                                     |
| Carbon emission                                    |                                                                        | 80 × 150 + 8.1 × 50 + 2.5 × 250 + 3.5 × 200 = 13730 kg CO <sub>2</sub> -e in 30 yrs |                            |                                                                 |                                     |
| Ecosystem values                                   |                                                                        | 0.0271                                                                              |                            |                                                                 |                                     |

Water retaining function = 400 × 8.68% + 450 × 5.79% = 60.77
